# Supplementary material for: A review of the green chemistry approaches to leather tanning in imparting sustainable leather manufacturing
Source: Royal Society of Chemistry journal article supplement (doi:10.1039/d3gc02948d), 2023-01-01
Supplement: d3gc02948d1.pdf [file d3gc02948d1.pdf]

# **A review of the green chemistry approaches to leather tanning in imparting sustainable leather manufacturing**

## **Supplementary Materials**

### **Contents**

**Table S1.** Tanning performance of leather treated by improved Cr tanning process.

**Table S2.** Tanning performance of chrome-free leather tanned by chemical cross-linking.

**Table S3.** Tanning performance of chrome-free leather tanned by cross-linking with aldehydes.

**Table S1.** Tanning performance of leather treated by improved Cr tanning process.

| Tanning agents                                                                                       | Type of leather      | Tanning agent consumption (l/Kg)                                                                                            | Chemicals consumption (g/Kg) | Water consumption (l/Kg) | Shrinkage temperature (°C) | Tensile strength (MPa)/Elongation (%) / Tearing strength (N/mm) | Ref. |
|------------------------------------------------------------------------------------------------------|----------------------|-----------------------------------------------------------------------------------------------------------------------------|------------------------------|--------------------------|----------------------------|-----------------------------------------------------------------|------|
| <u>Chrome-tanning with other metals and zeolites</u>                                                 |                      |                                                                                                                             |                              |                          |                            |                                                                 |      |
| BCS + FS                                                                                             | Cowhides             | 15.4 + 6.6                                                                                                                  | 20.0                         | n/a                      | 110.0                      | 26.4 / 74.0 / 75.6                                              | 67   |
| BCS + BAS + FS                                                                                       | Cowhides             | 11.0 + 7.7 + 3.3                                                                                                            | 20.0                         | n/a                      | 109.0                      | 24.7 / 53.0 / 81.0                                              |      |
| BCS + BAS + ZrS                                                                                      | Cowhides             | 11.0 + 7.7 + 3.3                                                                                                            | 21.0                         | n/a                      | 119.0                      | 43.0 / 84.0 / 79.1                                              |      |
| BCS + sodium zeolites (lab-scale)*                                                                   | Pickled sheepskin    | 80.0 + 30.0                                                                                                                 | 110.0                        | 2.74                     | 105.0                      | n/a                                                             | 68   |
| BCS + sodium zeolites (pilot-scale)*                                                                 |                      | 76.4 + 30.0                                                                                                                 | 116.4                        | 0.93                     | 104.0                      | 24.4 / 46.0 / 94.0                                              |      |
| BCS + re-tanning with acrylic and phenolic syntans and fatliquoring*                                 | Raw goatskin         | 80.0                                                                                                                        | -                            | -                        | 110.0±1.0                  | 25.6 ± 0.5 / 76.0 ± 3.0 / n/a                                   | 69   |
| <u>Cr tanning with Cr adsorption increasing additives</u>                                            |                      |                                                                                                                             |                              |                          |                            |                                                                 |      |
| BCS + PBA nanoparticle dispersion, then re-tanning/fatliquoring with syntan and sulphited oil*       | Pickled cowhide      | 80.0 + 40.0                                                                                                                 | 135.0                        | n/a                      | 126.0±1.2                  | 27.9 ± 0.6 / 84.0 ± 4.0 / n/a                                   | 32   |
| BCS + oxazolidine                                                                                    | Cowhides             | 90.0 + 10.0                                                                                                                 | 180.0                        | 1.8                      | 105.0±2.0                  | 25.0 / n/a / 57.9                                               | 66   |
| BCS + TLWP                                                                                           | Pickled cow pelt     | 60.0 + 60.0                                                                                                                 | 140.0                        | 1.0                      | 106.0±0.5                  | 27.0 ± 0.3 / 58.0 ± 1.0 / 57.0 ± 1.0                            | 69   |
| BCS + AVP-ZnO                                                                                        | Cowhides             | 35.0 + 30.0                                                                                                                 | 165.0                        | n/a                      | 92.4                       | n/a                                                             | 70   |
| BCS + AVP-ZnO, then re-tanned with the same                                                          | Cowhides             | 35.0 + 30.0/30.0 + 20.0                                                                                                     | 215.0                        | n/a                      | 124.7                      | 24.7 / 80.0 / 141.7                                             |      |
| BCS + AVP-MMT                                                                                        | Salted goatskin      | 30.0 + 20.0                                                                                                                 | n/a                          | n/a                      | 104.3                      | 16.0 / 76.0 / 55.0                                              | 71   |
| BCS + HBAP                                                                                           | Pickled pigskin      | 80.0 + 40.0                                                                                                                 | 350.0                        | n/a                      | 107.5                      | n/a                                                             | 73   |
| BCS + RSTW-PEG                                                                                       | Cowhides<br>Goatskin | 60.0 + 50.0                                                                                                                 | n/a                          | n/a                      | n/a                        | 24.1 ± 0.4 / 56.0 ± 1.0 / 49.1 ± 1.0                            | 76   |
| <u>Cr adsorption increase by sonication</u>                                                          |                      |                                                                                                                             |                              |                          |                            |                                                                 |      |
| BCS tanning under sonication (300 Watt/28 KHz) Cr* treatment using                                   | Pickled goatskin     | 20.0 g/l <sup>d</sup>                                                                                                       | n/a                          | n/a                      | 105.2                      | 13.8 / 40.1 / 56.2                                              | 77   |
| Sonicated Cr treatment using BCS*                                                                    | Cowhides             | 60.0 g/l <sup>d</sup>                                                                                                       | n/a                          | n/a                      | 104.5                      | n/a                                                             | 80   |
| Sonicated (150 Watt/40KHz) Cr* treatment using BCS                                                   | Pickled cowhide      | 50.0 g/l <sup>d</sup>                                                                                                       | n/a                          | n/a                      | 116.0±1.0                  | n/a / 33.2 ± 1.3 / 70.0 ± 4.0                                   | 81   |
| Sonicated Cr treatment using BCS + microwave*                                                        | Pickled goatskin     | 20.0 g/l <sup>d</sup>                                                                                                       | n/a                          | n/a                      | 103.8                      | 15.4 / n/a / 34.2                                               | 82   |
| <u>Waterless tanning</u>                                                                             |                      |                                                                                                                             |                              |                          |                            |                                                                 |      |
| Waterless tanning with BCS in propylene carbonate                                                    | Cowhides             | 50.0                                                                                                                        | 70.0                         | 0.15                     | 100.0                      | n/a                                                             | 88   |
| BCS in SC-CO <sub>2</sub>                                                                            | Cattle skin          | 90.0 g/l BCS + 120.0 g/l NaCl + 5.0 ml formic acid + 8.0 ml/l sulphuric acid for 2.5 hr under 6.0 MPa pressure <sup>d</sup> |                              |                          | 100.0                      | n/a                                                             | 91   |
| Tanning in 2:1 urea and KCr(SO <sub>4</sub> ) <sub>2</sub> ·10H <sub>2</sub> O deep eutectic solvent | Cowhides             | The Cr content of leather was 3.52%                                                                                         |                              |                          | 83.0                       | 30.3 / 42.5 / n/a                                               | 92   |
| <u>Cr tanning in combination with tannins, syntans, resins, and other crosslinking agents</u>        |                      |                                                                                                                             |                              |                          |                            |                                                                 |      |
| Cr-syn/PAA/PMA, then fatliquoring                                                                    | Delimed goat skin    | 15.0                                                                                                                        | 80.0                         | 1.5                      | 118.0 ± 2.0                | 32.9 ± 1.0 / 78.0 ± 4.0 / 84.3 ± 5.0                            | 33   |
| <i>Cassia alata</i> tannin + BCS                                                                     | Raw goatskin         | 65.0 + 25.0                                                                                                                 | 145.0                        | n/a                      | 95.0                       | 12.0 / 53.5 / 49.2                                              | 34   |
| ( <i>Cassia alata</i> tannin + <i>Cassia alata</i> tannin induced Ag NP) + BCS                       | Raw goatskin         | 65.0 + 25.0                                                                                                                 | 145.0                        | n/a                      | 107.0                      | 21.7 / 66.5 / 60.6                                              |      |

|                                                                                     |                     |                   |       |     |          |                                      |    |
|-------------------------------------------------------------------------------------|---------------------|-------------------|-------|-----|----------|--------------------------------------|----|
| Cr (III)-loaded nanoparticles of PEGMA-co-AA-co-GMA and then fatliquoring treatment | Pickled sheepskin   | 20.0 <sup>b</sup> | 243.0 | 7.3 | 101.5    | 12.4 / 98.8 / 30.5                   | 38 |
| Cr-acid complex formulation, then re-tanned/fatliquored with syntan                 | Wet salted goatskin | 40.0              | 370.0 | 2.0 | >100.0   | 23.3 ± 0.9 / 72.6 ± 1.2 / 68.8 ± 0.9 | 93 |
| Pickling with oxazolidine + BCS                                                     | Pickled goatskin    | 40.0 + 70.0       | 130.0 | n/a | 107.5    | 22.9 / 82.7 / 71.2                   | 94 |
| BCS + acrylic resin/montmorillonite                                                 | -                   | 60.0 + 20.0       | 160.0 | 2.0 | 89.0     | 17.7 / 8.9 / 29.1                    | 95 |
| BCS + SiNP-pMMA-BA (1% Si NP)                                                       | Pickled buffalo     | 30.0 + 40.0       | 170.0 | 2.0 | 100.0    | 48.5 / 72.0 / n/a                    | 97 |
| BCS + SiNP-pMMA-BA (5% Si NP)                                                       | hides               | 30.0 + 40.0       | 170.0 | 2.0 | 115.0    | 41.0 / 56.0 / n/a                    |    |
| MgAl-LDH + BCS                                                                      | Pickled goatskin    | 40.0 + 20.0       | 60.0  | n/a | 94.0±3.0 | 19.3 ± 0.6 / n/a / 26.1 ± 0.7        | 99 |

N.B. The calculation of BCS, BAS, ZrS, and FS was based on their Cr<sub>2</sub>O<sub>3</sub>, Al<sub>2</sub>O<sub>3</sub>, ZrO<sub>2</sub>, and Fe<sub>2</sub>O<sub>3</sub> contents respectively, and also the weight of wet skins.

<sup>a</sup>No re-tanning/fatliquoring treatment or fatliquoring but dosage was not provided.

<sup>b</sup>The authors did not provide re-tanning and fatliquoring chemical consumption provided.

<sup>c</sup>The nanoparticles contain 4% Cr. The dosage is equivalent to 20 g Cr/kg pickled wet leather containing 200% water.

<sup>d</sup>Soaked in this solution for 5 to 6 min.

<sup>e</sup>Calculated based on Cr content.

**Table S2.** Tanning performance of chrome-free leather tanned by chemical cross-linking.

| Tanning agents                                                                                                    | Type of leather   | Tanning agent consumption<br>(l/Kg) | Chemicals<br>consumption<br>(g/Kg) | Water<br>consumption<br>(l/Kg) | Shrinkage<br>temperature<br>(°C) | Tensile strength<br>(MPa)/Elongation (%)/Tearing<br>strength (N/mm) | Ref. |
|-------------------------------------------------------------------------------------------------------------------|-------------------|-------------------------------------|------------------------------------|--------------------------------|----------------------------------|---------------------------------------------------------------------|------|
| Glutaraldehyde + Tara tannin followed by re-tanning with polyaryl sulphate                                        | Pickled sheepskin | 250.0                               | 627.5                              | 6.0                            | 92.0±1.0                         | 23.0 ± 1.8 / n/a / 51.0 ± 7.8                                       | 41   |
| Syntan + Mimosa tannin + oxazolidine, and then fatliquoring/dyeing                                                | Calfskin          | 150.0 + 40.0 + 200.0                | 494.0                              | 9.5                            | 98.0                             | 16.6 / n/a / 44.0                                                   | 42   |
| Glutaraldehyde + Mimosa tannin + oxazolidine, and then fatliquoring/dyeing                                        | Calfskin          | 10.0 + 40.0 + 200.0                 | 354.0                              | 9.5                            | 104.0                            | 21.0 / n/a / 50.9                                                   |      |
| THPS + Tara tannin + glutaraldehyde, then re-tanned and fatliquored                                               | Pickled sheepskin | 15.0 + 100.0 + 20                   | 475.0                              | 3.5                            | 88.0 ± 1.0                       | 16.2 ± 0.5 / 58.0 ± 2.0 / n/a                                       | 111  |
| Glutaraldehyde + syntan followed by re-tanning/fatliquoring with acrylic syntan and vegetable tannin <sup>a</sup> | Salted goatskin   | 25.0 + 20.0                         | 213.0                              | n/a                            | 85.0                             | 15.6 / 44.1 / n/a                                                   | 112  |
| Glutaraldehyde tanning followed by re-tanning with melamine resin                                                 | Salted goatskin   | 110.0                               | 110.0                              | 0                              | 90.0±4.0                         | 15.0 ± 2.0 / 72.0 ± 6.0 / n/a                                       | 115  |
| Lysine + glutaraldehyde and then re-tanning with melamine resin                                                   | Salted goatskin   | 10.0 + 20.0 + 40.0                  | 85.0                               | 0.5                            | 120.0±8.0                        | 18.0 ± 3.0 / 56.0 ± 6.0 / n/a                                       |      |
| Glyoxal                                                                                                           | Pickled goatskin  | 60.0                                | 60.0                               | n/a                            | 82.0                             | n/a                                                                 | 116  |
| EHBP-D + BAS                                                                                                      | Pickled goatskin  | 80.0 + 60.0                         | 340.0                              | 2.0                            | 108.6±1.1                        | 15.0 ± 3.7 / 93.8 ± 6.3 / 30.6 ± 6.3                                | 122  |
| BDA + Acrylic resin + Amino resin + mimosa + BAS                                                                  | Pickled sheepskin | 20.0 + 30.0 + 20.0 + 40.0 + 10.0    | 320.0                              | 19.5                           | 88.0                             | 17.5 / 85.0 / 15.0                                                  | 127  |
| THPS + syntan followed by re-tanning & fatliquoring twice                                                         | Salted goatskin   | 20.0 + 20.0 + 60.0 + 135.0          | 681.0                              | 27.0                           | 91.0                             | n/a / 28.5 / 28.4                                                   | 128  |
| POSS-NH <sub>2</sub> + THPS                                                                                       | Salted goatskin   | 60.0 + 25.0                         | 90.0                               | n/a                            | 83.0                             | 17.1 / 102.2 / 74.5                                                 | 129  |
| HHTT-EGDE-CP                                                                                                      | Pickled sheepskin | 120.0                               | 474.0                              | 17.0                           | 78.8                             | 13.5 / 68.2 / 54.2                                                  | 130  |
| AEHET                                                                                                             |                   | 120.0                               | 464.0                              | 17.0                           | 75.7                             | 7.9 / 73.4 / 23.9                                                   |      |
| COS-GTE tanning followed by fatliquoring                                                                          | Sheep hides       | 150.0                               | 418.0                              | 9.0                            | 83.5                             | 10.1 / 62.6 / 47.4                                                  | 131  |
| AAMV tanning, then re-tanning and fatliquoring                                                                    | Pickled sheepskin | 80.0 + 50.0 + 40.0                  | 310.0                              | n/a                            | 70.0                             | 13.0 / 60.0 / 54.0                                                  | 133  |
| Tara tannin + BAS + glutaraldehyde, then re-tanning/fatliquoring with syntan                                      | Cow upper skin    | 200.0 + 170.0 + 10.0 + 2.00         | 607.0                              | 13.5                           | 103.0                            | n/a                                                                 | 134  |

N.B. The calculation of BAS was calculated based on its Al<sub>2</sub>O<sub>3</sub> content and also on the weight of wet skins.

<sup>a</sup>The chemical consumption does not include fatliquoring chemicals.

<sup>b</sup>No re-tanning and fatliquoring treatment.

**Table S3.** Tanning performance of chrome-free leather tanned by cross-linking with dialdehyde polymers.

| Tanning agents                                                                                                             | Type of leather     | Tanning agent consumption (l/Kg) | Chemicals consumption (g/Kg) | Water consumption (l/Kg) | Shrinkage temperature (°C) | Tensile strength (MPa)/Elongation (%) / Tearing strength (N/mm) | Ref. |
|----------------------------------------------------------------------------------------------------------------------------|---------------------|----------------------------------|------------------------------|--------------------------|----------------------------|-----------------------------------------------------------------|------|
| SAD + fat liquoring                                                                                                        | Pickled sheepskin   | 80.0                             | 212.0                        | 34.0                     | 89.4                       | 22.1 ± 2.7 / 42.5 ± 7.0 / 114.6 ± 4.4                           | 3    |
| ZrS + oxidised starch (with 60% H <sub>2</sub> O <sub>2</sub> ), then re-tanning with mimosa and syntans, and fatliquoring | Pickled cattlehides | 175.0 + 48.0 + 70.0              | 590.0                        | 30.5                     | 87.3 ± 0.5                 | 15.6 ± 0.7 / n/a / 76.9 ± 2.5                                   | 126  |
| SPDA (4% solution) tanning followed by fatliquoring                                                                        | Pickled sheepskin   | 80.0                             | 250.0                        | 13.0                     | 79.0                       | 19.7 ± 1.8 / 107.9 ± 8.1 / n/a                                  | 139  |
| CMC-D + SAD                                                                                                                | Pickled cattle pelt | 40.0 + 7.0                       | 47.0                         | n/a                      | 81.0                       | n/a                                                             | 140  |
| SAD                                                                                                                        |                     | 7.0                              | 7.0                          | n/a                      | 79.0                       | n/a                                                             |      |
| H-CMC + SAD                                                                                                                |                     | 40.0 + 40.0                      | 80.0                         | n/a                      | 72.0                       | n/a                                                             |      |
| CMC-D, then fatliquoring with synthetic fatliquor                                                                          | Pickled cattlehides | 40.0                             | 100.0                        | 10.0                     | 78.8                       | 7.07 ± 0.23 / n/a / 22.95 ± 0.31                                | 142  |
| CMC-D + chitosan                                                                                                           |                     | 40.0 + 20.0                      | 120.0                        | 10.0                     | 85.0                       | n/a                                                             |      |
| CMC-D + chitosan, then fatliquoring with synthetic fatliquor                                                               |                     | 40.0 + 20.0                      | 190.0                        | 19.5                     | 80.0                       | 3.43 ± 0.60 / n/a / 16.16 ± 1.13                                |      |
| CMC-D + LMC-III, then fatliquoring with synthetic fatliquor                                                                |                     | 40.0 + 20.0                      | 190.0                        | 19.5                     | 80.0                       | 12.7 ± 1.5 / n/a / 28.8 ± 0.5                                   |      |
| TGD                                                                                                                        | Pickled sheepskin   | 80.0                             | 656.0                        | 8.0                      | 86.7                       | n/a                                                             | 143  |
| SAD                                                                                                                        |                     | 80.0                             | 656.0                        | 8.0                      | 83.9                       | n/a                                                             |      |
| CDD                                                                                                                        |                     | 80.0                             | 656.0                        | 8.0                      | 82.0                       | n/a                                                             |      |
| Al-m-CCA (equal to Al <sub>2</sub> O <sub>3</sub> ) + ZrS                                                                  | Pickled cattle pelt | 15.0 + 40.0                      | 215.0                        | 1.0                      | 84.5                       | 12.1 / 25.0 / 37.5                                              | 144  |
| Al-m-MCA (equal to Al <sub>2</sub> O <sub>3</sub> ) + ZrS                                                                  | Pickled cattle pelt | 150.0 + 40.0                     | 210.0                        | 2.0                      | 86.0                       | n/a                                                             | 145  |
| Zr-m-HCD + ZrS                                                                                                             | Pickled cattle pelt | n/a + 20.0                       | n/a                          | 2.0                      | 75.2                       | n/a                                                             | 146  |
| Al-m-HCD (equal to Al <sub>2</sub> O <sub>3</sub> ) + ZrOCl <sub>2</sub>                                                   | Pickled cattle pelt | 10.0 + 30.0                      | 100.0                        | 2.0                      | 87.0                       | n/a                                                             | 146  |
| (SBCD) + re-tanning with syntan followed by fatliquoring                                                                   | Salted goatskin     | 100.0 + 160.0                    | 420.0                        | 3.0                      | 73.0 ± 2.0                 | 19.9 ± 1.3 / n/a / 40.6 ± 0.9                                   | 147  |
| CSD <sup>b</sup>                                                                                                           | Pickled sheepskin   | 100.0                            | 160.0                        | 5.0                      | 77.9                       | 8.6 / 72.0 / 14.5                                               | 148  |
| CSD-g-EGDE + HMTA <sup>b</sup>                                                                                             |                     | 100.0 + 5.0                      | 165.0                        | 5.0                      | 85.2                       | 10.9 / 85.0 / 29.6                                              |      |
| TA-d-PEG <sup>b</sup>                                                                                                      | Cowhide             | 160.0                            | 160.0 + NaHCO <sub>3</sub>   | 6.0                      | 80.8 ± 0.2                 | 15.3 ± 0.1 / 66.8 ± 0.2 / 44.2                                  | 149  |
|                                                                                                                            |                     |                                  | for neutralisation           |                          |                            |                                                                 |      |
| CSD tanning followed by fatliquoring with several natural and synthetic fatliquoring agents                                | Pickled goatskin    | 200.0                            | 350.0                        | 9.0                      | 61.0 ± 1.0                 | 28.2 ± 2.9 / 72.9 ± 10.1 / n/a                                  | 150  |

N.B. The calculation of BAS and ZrS were calculated based on their Al<sub>2</sub>O<sub>3</sub> and ZrO<sub>2</sub> contents respectively and also on the weight of wet skins.

<sup>a</sup>The chemical consumption does not include fatliquoring chemicals.

<sup>b</sup>No re-tanning and fatliquoring treatment.
